# Supplementary material for: Real-time kinetic analysis and detection of glycated hemoglobin A1c using a quartz crystal microbalance-based aptasensor
Source: Royal Society of Chemistry journal article supplement (doi:10.1039/d3ay01842c), 2023-12-19
Supplement: d3ay01842c1.pdf [file d3ay01842c1.pdf]

## Supplementary data for

### Real-Time Kinetic Analysis and Detection of Glycated Hemoglobin A1c using Quartz Crystal Microbalance-Based Aptasensor

Yossawadee Sriondee<sup>a</sup>, Pasara Vijitvarasan<sup>b</sup>, Arunothai Rattanachata<sup>d</sup>, Hideki Nakajima<sup>d</sup>,  
Sukunya Oaew<sup>c\*</sup>, Sarawut Cheunkar<sup>a\*</sup>

<sup>a</sup>*Biotechnology Division, School of Bioresources and Technology, King Mongkut's University of Technology Thonburi, Bangkok, 10150, Thailand*

<sup>b</sup>*Nakhonsawan campus, Mahidol University, Nakhonsawan, 60130, Thailand*

<sup>c</sup>*Biochemical Engineering and Systems Biology Research Group, National Center for Genetic Engineering and Biotechnology, National Science and Technology, Development Agency at King Mongkut's University of Technology Thonburi, Bang Khun Thian, Bangkok, 10150, Thailand*

<sup>d</sup>*Synchrotron Light Research Institute, Nakhon Ratchasima, 30000, Thailand*

\*E-mail: [sarawut.che@mail.kmutt.ac.th](mailto:sarawut.che@mail.kmutt.ac.th) \*E-mail: [sukunya.oae@biotec.or.th](mailto:sukunya.oae@biotec.or.th)

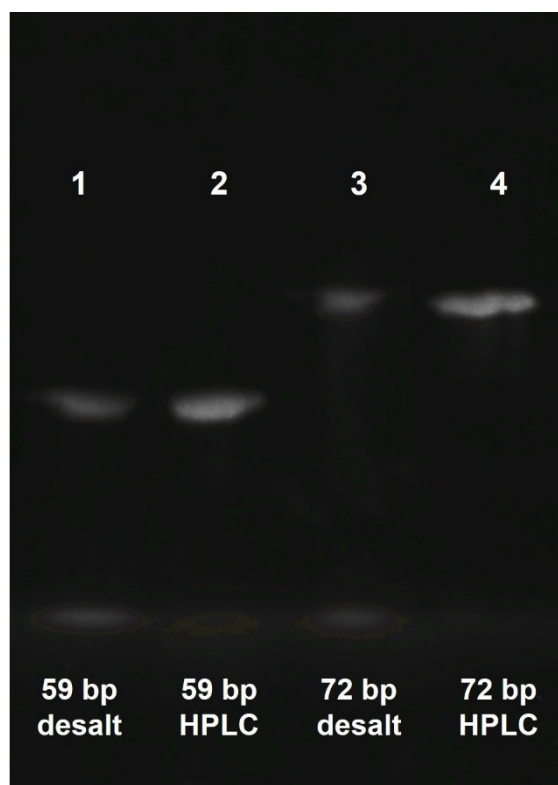

**Fig. S1** Denatured polyacrylamide gel electrophoresis of HbA1c aptamers. 59-base aptamer desalt grade (lane 1), 72-base aptamer desalt grade (lane 2), 59-base HPLC grade (lane 3), 72-base HPLC grade (lane 4)

**Table S1** Secondary structure simulation of each aptamer at the lowest  $\Delta G$  value

| Structure                                                                                                                                                                                                                 | $\Delta G$<br>(kcal.mole <sup>-1</sup> ) |
|---------------------------------------------------------------------------------------------------------------------------------------------------------------------------------------------------------------------------|------------------------------------------|
| <p>59-base aptamer: 5'- GGG GAC ACA GCA ACA CAC<br/>CCA CCC ACC AGC CCC AGC ATC ATG CCC ATC<br/>CGT CGT GTG TG-3'</p> 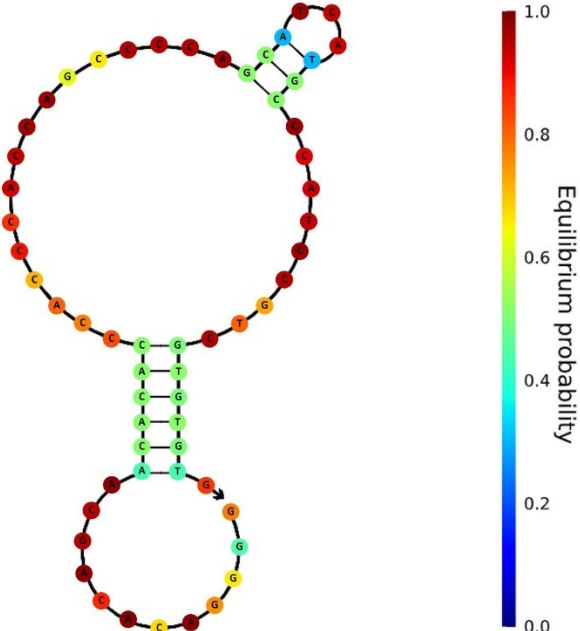                  | <p>-3.22</p>                             |
| <p>72-base aptamer: 5'-GGC AGG AAG ACA AAC ACA<br/>TCG TCG CGG CCT TAG GAG GGG CGG ACG GGG<br/>GGG GGC GTT GGT CTG TGG TGC TGT-3'</p>  | <p>-9.47</p>                             |

**Table S2** Summary of the analyzed data using the Plot profile function from ImageJ.

| Lane | Area | Mean   | Min    | Max    | Integrated Density | Difference Integrated Density |
|------|------|--------|--------|--------|--------------------|-------------------------------|
| 1    | 64   | 65.649 | 46.50  | 70.965 | 4201.536           | 1557.824                      |
| 2    | 64   | 41.308 | 37.98  | 45.728 | 2643.712           |                               |
| 3    | 64   | 87.673 | 56.925 | 94.157 | 5611.072           | 1981.632                      |
| 4    | 64   | 56.710 | 52.519 | 61.658 | 3629.440           |                               |

The gel image (Fig. 2) was analyzed by the Plot profile function of ImageJ software. The integrated intensity of each lane was calculated from the product of the area (64 pixels for all lanes) and the mean gray value.

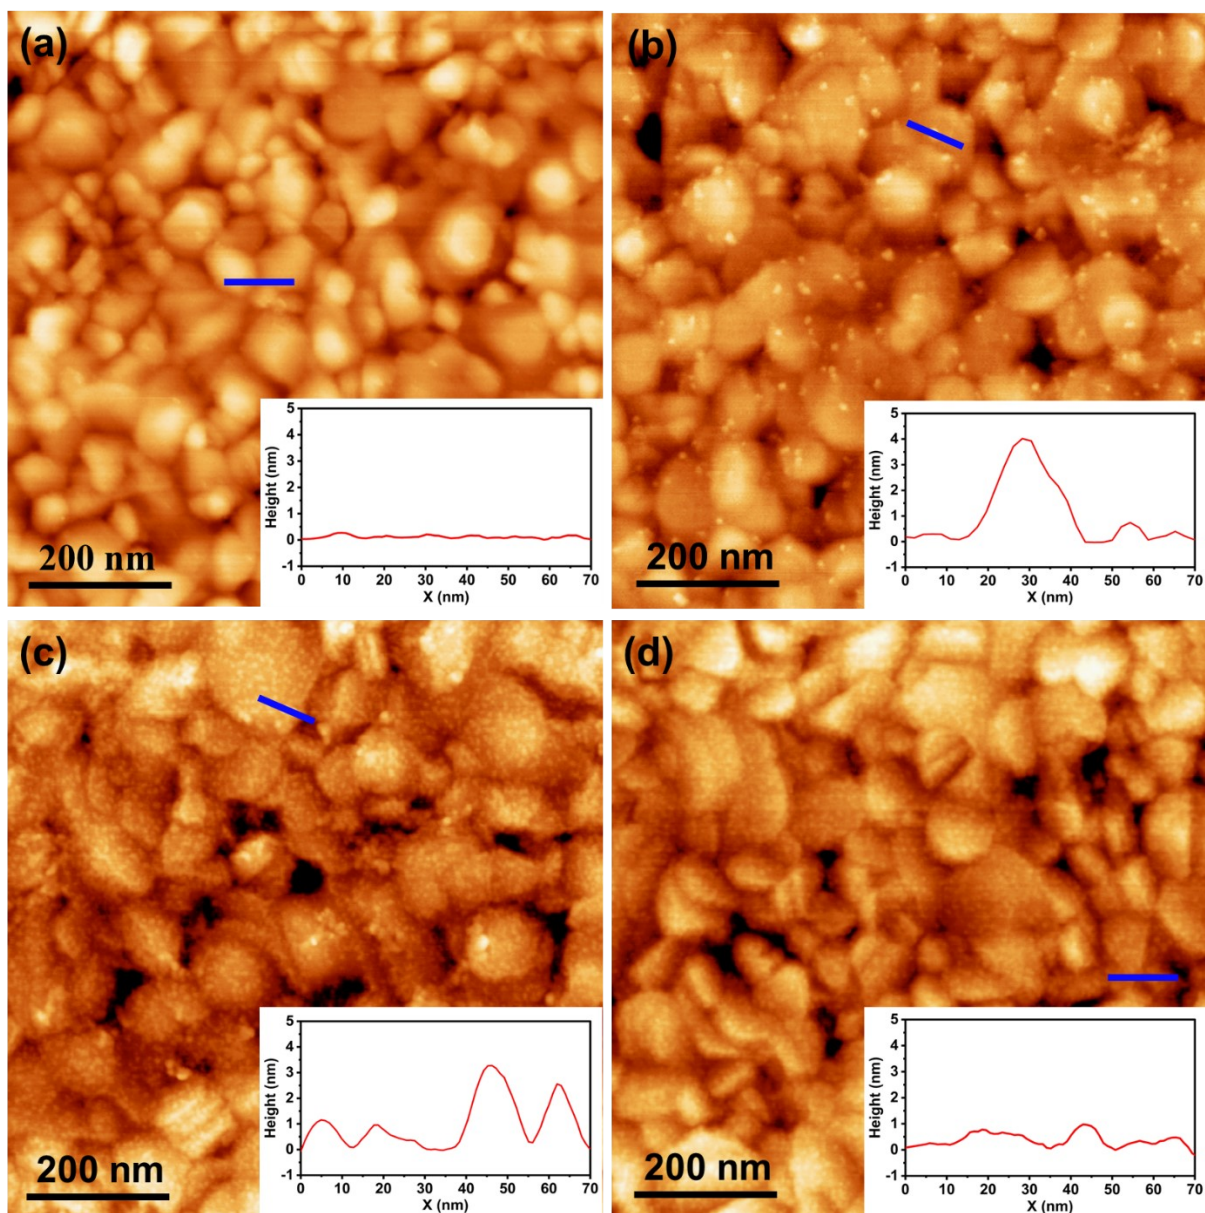

**Fig. S2** Atomic force microscope (AFM) images of mixed SAMs-modified QCM substrates under different pretreatment processes: (a) bare gold (Au) on a quartz crystal, (b) normal preparation conditions (without pretreating the mixture), (c) ultrasonic pretreatment of the mixture for 1 min, and (d) ultrasonic pretreatment with horizontal shaking at 100 rpm during incubation overnight. The insets represent the height profile of the surface corresponding to the blue lines.

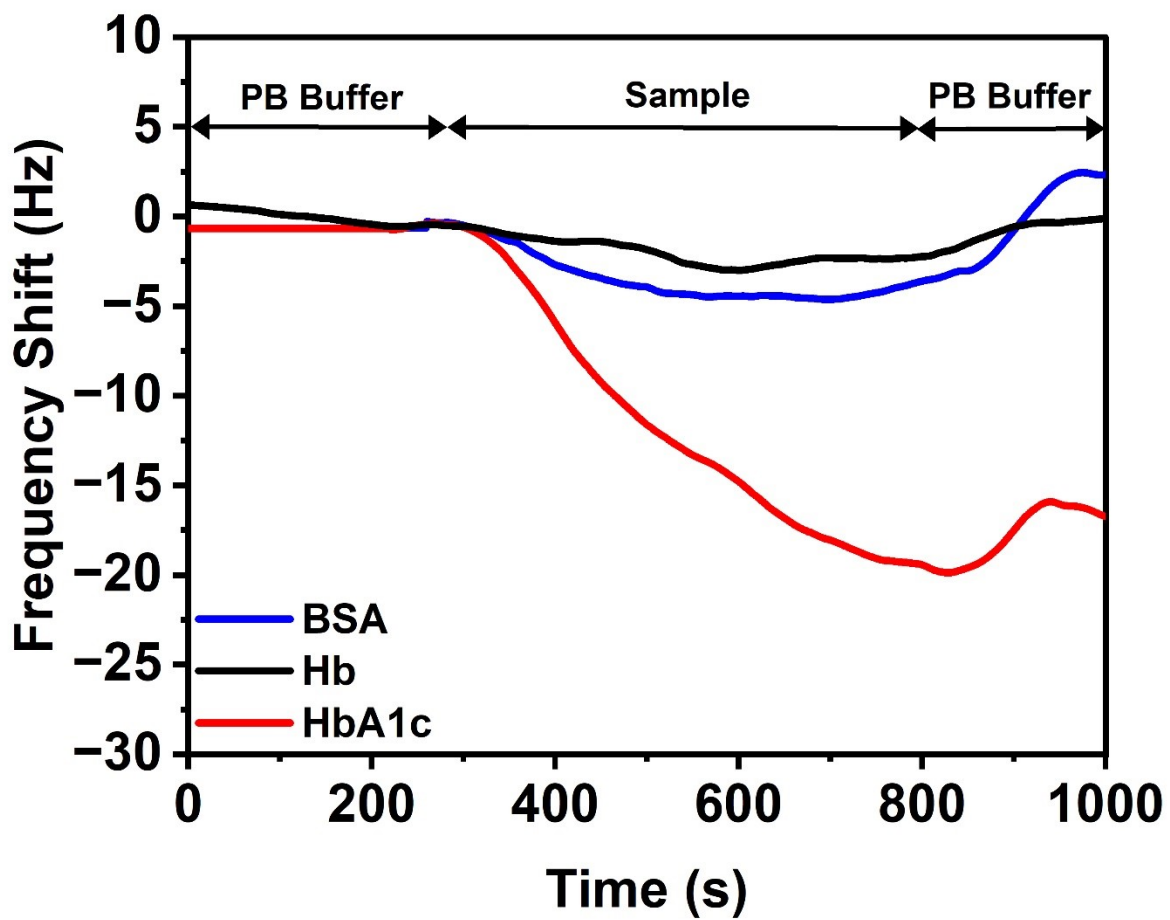

**Fig. S3** QCM signals of non-specific adsorption of BSA (blue), Hb (black), and HbA1c (red) on aptamer functionalized surfaces.

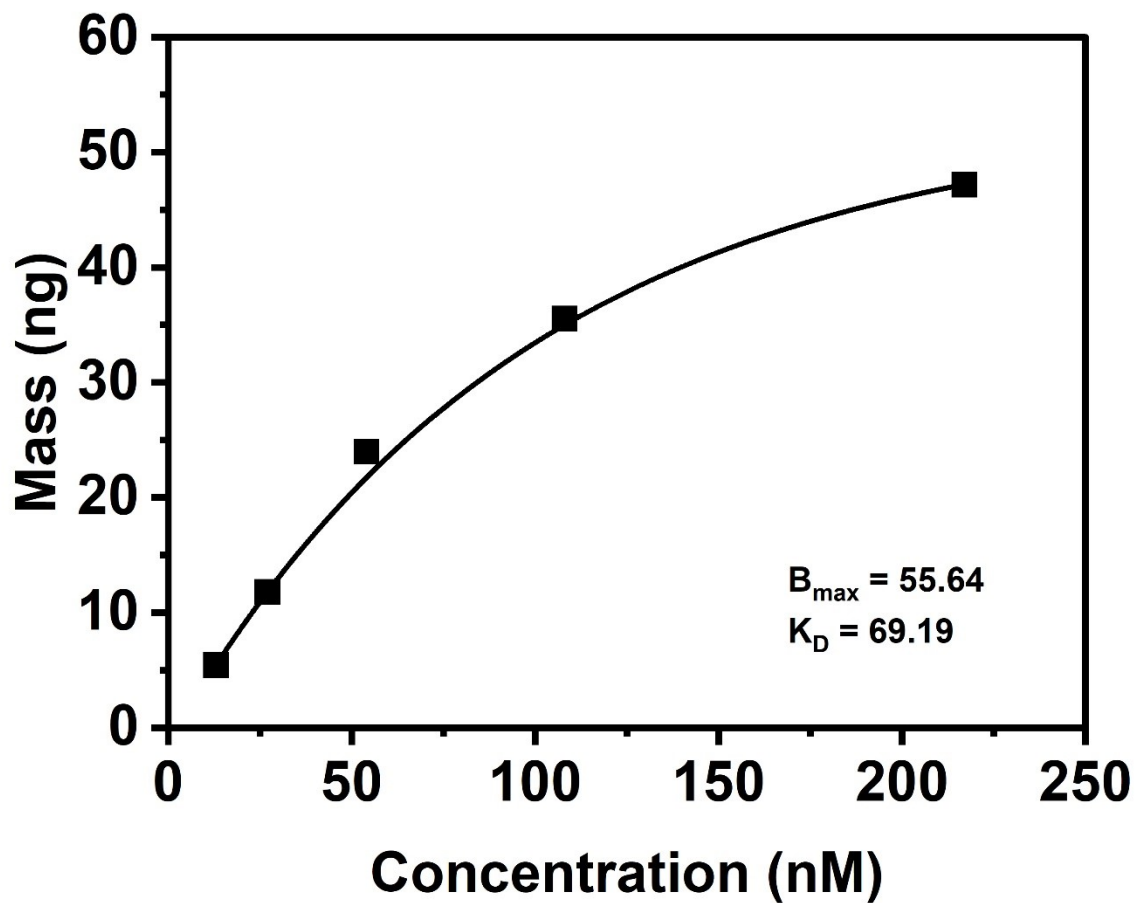

**Fig. S4** The equilibrium characterization by using the saturation binding curve. Fitting the mass and HbA1c concentrations with the one-site specific binding model gave the  $K_D$  of 69.19 nM.

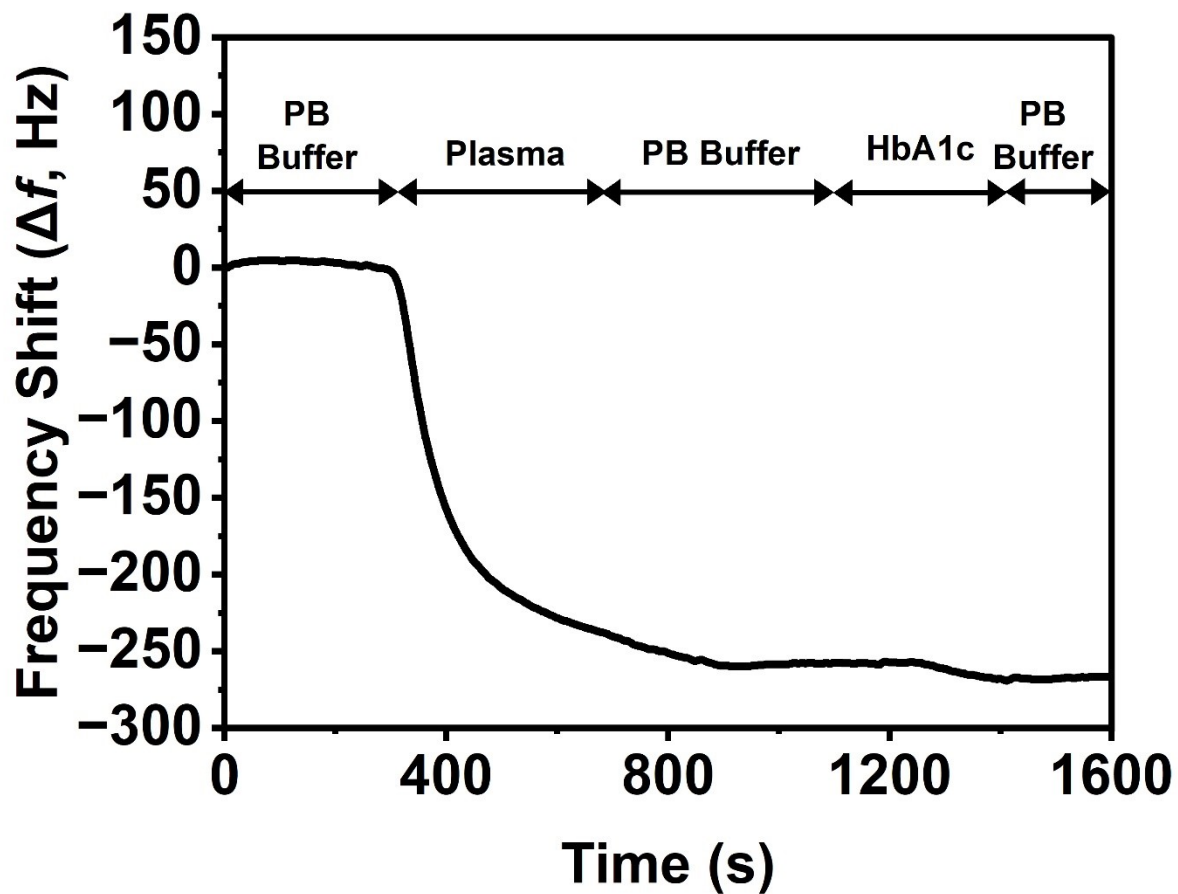

**Fig. S5** A representative QCM measurement of spiked samples in real human plasma. The diluted human plasma was first introduced for 10 min to establish a baseline, followed by the injection of spiked sample.
